# Supplementary material
Source: MDPI journal article supplement (https://www.mdpi.com/2075-163X/10/1/85)
Supplement: s1 [file Tabel S1 - Bulk-rock data.xlsx]

## Sheet: Bulk-rock data
Sample number	208001	208002	208003	186453
Rock type	Talc zone	Amphibole zone	Mica zone	Trondhjemite
SiO2	60.87	56.7	51.91	83.23
TiO2	0.025	0.022	0.077	0.019
Al2O3	0.59	1.52	6.18	9.96
FeOT	2.93	9.74	4.95	0.15
MnO	0.075	0.584	0.154	0.007
MgO	29.8	27.64	26.92	0.19
CaO	0.04	0.26	2.44	1.13
Na2O	0	0	0.32	4.64
K2O	0.39	1.2	4.62	0.3
P2O5	0.002	0.002	0.004	0.006
Sum	94.72	97.66	97.56	99.63
LOI %	4.13	1.42	1.89	0.08
Ni	2099	1177	1306	10
Cr	2359	2217	133	6
Cs	1.8	6.1	21.2	0.7
Sc	1.6	8.4	16.2	0.4
V	16.1	14.5	31.4	3.3
Ba	12.6	36.5	152.2	120.7
Rb	22.2	71.3	300.4	6.7
Sr	2	1	3	156
Zr	1	2	59	47
Y	1	2	28	2
Nb	0.28	1.24	5.32	0.58
Ga	3.7	6.2	18.2	13.3
Cu	10.3	2.3	2.1	12.8
Zn	81.4	107.8	43	14.7
Pb	0.23	0.38	1.62	17.42
Th	0.12	0.56	4.9	4.26
U	0.06	0.09	0.6	0.3
Hf	0.03	0.04	1.92	1.76
Ta	0.01	0.14	0.36	0.18
La	0.1	0.14	4.23	5.51
Ce	0.18	0.32	8.77	9.62
Pr	0.02	0.04	1.15	0.98
Nd	0.09	0.15	5.21	3.26
Sm	0.04	0.07	2.39	0.65
Eu	0.01	0.01	0.17	0.3
Gd	0.05	0.1	3.64	0.47
Tb	0.01	0.03	0.75	0.06
Dy	0.09	0.24	4.86	0.31
Ho	0.02	0.06	0.99	0.06
Er	0.06	0.23	2.72	0.16
Tm	0.01	0.05	0.39	0.02
Yb	0.09	0.43	2.37	0.16
Lu	0.01	0.07	0.35	0.02
