# Supplementary material
Source: MDPI journal article supplement (https://www.mdpi.com/2075-163X/10/1/85)
Supplement: s1 [file Tabel S2 - Raw EMPA data.xlsx]

## Sheet: EMPA Data
Rock type	Mineral	SiO2	MnO	K2O	Cr2O3	Na2O	Al2O3	FeO	CaO	NiO	MgO	TiO2	Total	Spot
Amphibole zone	Anthophyllite	59.8	0.7369	0	0.0264	0.0425	0.0123	12.84	0.2725	0.1015	23.42	0	97.2522	DO_min12
Amphibole zone	Anthophyllite	58.04	0.7804	0.0011	0.0256	0.0689	0.0584	11.78	0.2693	0.145	26	0.0125	97.1813	DO_min13
Amphibole zone	Anthophyllite	58.05	0.69	0	0.055	0.0266	0.0799	12.06	0.2347	0.0897	25.93	0.006	97.2219	DO_min13
Amphibole zone	Anthophyllite	58.05	0.6905	0.0056	0.0331	0.0435	0.0602	12.56	0.276	0.1198	25.96	0.0104	97.8091	DO_min13
Amphibole zone	Anthophyllite	58.28	0.5788	0	0.0668	0.0536	0.083	10.49	0.3247	0.1325	27.84	0	97.8494	DO_min15
Amphibole zone	Anthophyllite	58.15	0.5783	0	0.0429	0.0374	0.1217	10.58	0.3836	0.1944	27.45	0.0267	97.5651	DO_min15
Amphibole zone	Anthophyllite	58.25	0.8027	0	0.0209	0.0276	0.0483	11.67	0.2957	0.0792	26.83	0.0086	98.0331	DO_min15
Amphibole zone	Anthophyllite	58.13	0.7267	0.0112	0.0805	0.0527	0.0802	12.1	0.2617	0.1263	25.79	0	97.3594	PO_min2
Amphibole zone	Anthophyllite	58.05	0.6967	0.0034	0.0323	0.0402	0.0735	12.17	0.2688	0.1027	25.93	0	97.3677	PO_min2
Amphibole zone	Anthophyllite	58.34	0.819	0.0202	0.0208	0.0341	0.0041	12.34	0.3021	0.11	25.27	0.0343	97.2947	PO_min2
Amphibole zone	Anthophyllite	58.16	0.6278	0.0034	0.0306	0.0635	0.0933	11.08	0.3622	0.141	26.31	0.0026	96.8745	PO_min4
Amphibole zone	Anthophyllite	58.16	0.6325	0.0011	0.037	0.0558	0.0472	11.99	0.2927	0.1147	26.02	0.0123	97.3633	PO_min4
Amphibole zone	Anthophyllite	57.84	0.7113	0.0045	0.0142	0.0307	0.0141	12.6	0.3105	0.1271	25.54	0.0031	97.1955	PO_min4
Amphibole zone	Anthophyllite	57.93	0.7932	0.0056	0.0133	0.0467	0.0473	12.09	0.5607	0.0659	25.75	0.0148	97.3176	PO_min8
Amphibole zone	Anthophyllite	57.95	0.6311	0.0112	0.0247	0.0475	0.0495	12.16	0.581	0.089	25.51	0.025	97.0791	PO_min8
Amphibole zone	Anthophyllite	57.64	0.7971	0.0157	0.0142	0.0733	0.0763	12.29	0.5244	0.1249	25.61	0	97.166	PO_min8
Amphibole zone	Chromite	0	0.9634	0.0188	48.69	0.0638	2.42	44.45	0	0.1041	1.1895	0.3089	98.2086	DO_min17
Amphibole zone	Chromite	0	1.2651	0.0198	49.06	0.0665	2.3	44.32	0	0.0627	0.8823	0.3045	98.281	PO_min1
Amphibole zone	Phlogopite	42.7	0.0915	8.05	0.5487	0.3544	11.14	4.37	0.2855	0.1922	25.22	0.1022	93.0546	DO_min14
Amphibole zone	Phlogopite	42.77	0.0483	8.54	0.4746	0.3859	10.73	4.28	0.0461	0.1695	25.42	0.1042	92.9687	DO_min14
Amphibole zone	Phlogopite	48.86	0.0054	6.57	0.4295	0.2394	9.26	3.98	0.1383	0.1949	26.43	0.1258	96.2334	DO_min14
Amphibole zone	Phlogopite	38.75	0.1222	7.99	7.62	0.3593	10.73	7.71	0.0087	0.1801	23.74	0.1465	97.3568	PO_min1
Amphibole zone	Phlogopite	43.3	0.0805	9.25	1.2667	0.3021	11.37	4.31	0.0307	0.1753	24.08	0.1373	94.3027	PO_min1
Amphibole zone	Phlogopite	42.7	0.0644	9.26	0.6893	0.3009	11.55	4.29	0.052	0.185	24.61	0.1387	93.8404	PO_min3
Amphibole zone	Phlogopite	42.83	0.0322	9.32	0.6112	0.3331	11.35	4.06	0.0692	0.2172	24.77	0.1057	93.6986	PO_min3
Amphibole zone	Phlogopite	43.14	0.0323	9.36	0.579	0.3129	11.12	4.09	0.0296	0.1956	24.8	0.1103	93.7698	PO_min3
Amphibole zone	Phlogopite	42.61	0	9.19	0.3825	0.3417	11.53	4.25	0.019	0.1457	25.01	0.1281	93.607	PO_min5
Amphibole zone	Phlogopite	42.65	0.0809	9.58	0.3039	0.3635	11.73	4.42	0.0208	0.1655	25.07	0.1435	94.5281	PO_min5
Amphibole zone	Phlogopite	42.65	0.0593	7.78	0.4213	0.4468	11.32	4.25	0.3598	0.2084	25.59	0.1271	93.2128	PO_min5
Amphibole zone	Phlogopite	42.12	0	8.85	0.272	0.385	11.04	4.27	0.1783	0.166	24	0.1063	91.3876	PO_min7
Amphibole zone	Phlogopite	42.64	0	9.4	0.2864	0.371	11.75	4.46	0.0249	0.1592	24.78	0.1192	93.9908	PO_min7
Amphibole zone	Phlogopite	42.68	0.0103	9.46	0.2102	0.3706	11.81	4.29	0.0244	0.2129	25.01	0.1397	94.2182	PO_min7
Amphibole zone	Talc	46.03	0.1187	0.5063	0.0058	0.0895	0.7064	3.2	0.1032	0.197	22.88	0.0053	73.8423	DO_min12
Amphibole zone	Talc	47.31	0.1511	0.0859	0.0039	0.0774	0.1008	4.45	0.0943	0.2648	25.41	0.0039	77.9521	DO_min12
Amphibole zone	Talc	62.57	0.0542	0.0239	0.0059	0.0347	0.0309	1.91	0	0.3004	29.68	0.0003	94.6104	DO_min16
Amphibole zone	Talc	62.68	0.0379	0.1581	0.0465	0.0402	0.1743	1.93	0.01	0.2959	29.86	0.0303	95.2633	DO_min16
Amphibole zone	Talc	63.16	0.0488	0.0319	0	0.0408	0.0743	2.06	0.0177	0.2864	29.56	0.0128	95.2927	DO_min16
Amphibole zone	Talc	63.01	0.0543	0	0.0179	0.0239	0.0287	1.79	0.0106	0.2146	29.38	0.0015	94.5315	PO_min6
Amphibole zone	Talc	61.96	0	0	0.0435	0.0775	0.0505	1.91	0.0012	0.2343	28.98	0.0092	93.2662	PO_min6
Amphibole zone	Talc	63.07	0.0543	0	0.0079	0.0548	0.03	1.98	0.0077	0.2372	29.51	0.0129	94.9649	PO_min6
Granitoid	Albite	65.1	0.0625	0.8265	0.0077	10.82	21.61	0.081	1.78	0	0.0185	0	100.306	PEG_min1
Granitoid	Albite	65.61	0	0.0837	0	10.56	21.84	0.0143	3.03	0.013	0	0.0124	101.163	PEG_min1
Granitoid	Albite	66.09	0	0.0935	0	10.61	21.9	0	2.92	0	0.0042	0.0067	101.624	PEG_min1
Granitoid	Albite	66.92	0.0313	0.0588	0.0124	11.13	21.07	0.0167	1.98	0.0232	0	0	101.242	PEG_min10
Granitoid	Albite	67.91	0	0.0327	0.0172	11.61	20.54	0.031	1.3639	0	0	0	101.505	PEG_min10
Granitoid	Albite	68.01	0.0052	0.0502	0	11.61	20.56	0	1.2042	0	0.001	0	101.441	PEG_min10
Granitoid	Albite	64.7	0.0157	0.0641	0	10.05	22.46	0	3.78	0	0.0086	0	101.078	PEG_min12
Granitoid	Albite	64.71	0	0.0522	0	10.1	22.49	0.0645	3.74	0.0254	0.0008	0.018	101.201	PEG_min12
Granitoid	Albite	64.92	0.0365	0.0759	0	10.09	22.75	0	3.73	0	0	0.0103	101.613	PEG_min12
Granitoid	Albite	58.01	0	0.7452	0.023	10.94	22.51	0	6.26	0.0072	0	0.0022	98.4977	PEG_min13
Granitoid	Albite	64.21	0	0.1815	0.0211	8.31	21.87	0.0382	3.36	0	0	0	97.9909	PEG_min13
Granitoid	Albite	64.46	0	0.1052	0.0182	9.82	22.79	0.0072	4	0	0	0	101.201	PEG_min13
Granitoid	Albite	66.23	0	0.1361	0.0038	7.06	22.45	0	3.38	0	0	0	99.2599	PEG_min13
Granitoid	Albite	68.59	0	0.0524	0.0129	11.9	20.19	0.0075	0.7936	0.0392	0	0	101.585	PEG_min6
Granitoid	Albite	65.18	0.0217	0.505	0.002	10.1	21.66	0.0721	2.9	0.0203	0.0295	0.0136	100.504	PEG_min7
Granitoid	Albite	65.5	0	0.0396	0	10.4	22.43	0.01	3.18	0	0	0.018	101.578	PEG_min7
Granitoid	Albite	65.63	0	0.2048	0	10.39	21.7	0.0198	3.04	0.0407	0	0.0164	101.042	PEG_min7
Granitoid	Albite	58.3	0	0.5776	0	11.29	22	0.1761	5.85	0.0083	0	0.0039	98.2059	PEG_min9
Granitoid	Albite	58.86	0	0.5049	0.001	9.06	21.21	0.7196	5.1	0.0189	2.78	0.0287	98.2831	PEG_min9
Granitoid	Phlogopite	38.67	0.2008	9.1	0.0186	0.0203	15.1	17.58	0.1496	0.0405	10.73	0.974	92.5839	PEG_min5
Granitoid	Phlogopite	38.18	0.0636	9.71	0	0.0647	15.22	16.74	0.0725	0.0554	13.97	2.46	96.5363	PEG_min8
Granitoid	Phlogopite	38.24	0.0901	9.98	0	0.0791	14.59	17.34	0.0244	0.0822	13.69	2.36	96.4759	PEG_min8
Granitoid	Phlogopite	38.69	0.0267	10.07	0.0085	0.0384	15.01	16.63	0	0.0693	14	2.4	96.9429	PEG_min8
Granitoid	Pigeonite	57.5	0.1668	0.0571	0	0.1443	0.598	9.07	12.67	0.009	18.48	0	98.6952	PEG_min5
Granitoid	Pigeonite	58.25	0.1616	0.0494	0	0.2043	0.5857	8.98	12.81	0.0247	19.13	0.0242	100.22	PEG_min5
Granitoid	Quartz	100.16	0	0.0188	0	0.0002	0	0	0.0052	0.0146	0.0126	0	100.211	PEG_min2
Granitoid	Quartz	100.24	0.0682	0.0497	0.0106	0.0052	0.001	0	0.0126	0	0.0005	0.0155	100.403	PEG_min2
Granitoid	Quartz	100.9	0.021	0.0044	0	0	0	0.0288	0.0086	0.0168	0	0.0155	100.995	PEG_min2
Granitoid	Quartz	102.26	0	0.0276	0	0.0128	0.0293	0.015	0.0095	0.0136	0.0161	0.0234	102.407	PEG_min6
Granitoid	Quartz	102.31	0	0.0104	0	0.0124	0	0.03	0	0.025	0.0031	0	102.391	PEG_min6
Mica zone	Phlogopite	43.29	0	8.33	0.0676	0.3656	10.61	4.14	0.1512	0.1454	26.08	0.1125	93.2924	PO_min10
Mica zone	Phlogopite	44.02	0.0269	8.66	0.0677	0.344	10.61	4	0.1583	0.2606	25.53	0.1276	93.8052	PO_min10
Mica zone	Phlogopite	44.05	0.0431	8.79	0.0598	0.3419	11.13	4.25	0.0831	0.1679	25.58	0.0557	94.5516	PO_min10
Mica zone	Phlogopite	42.44	0	10.01	0.0176	0.397	12.3	4.67	0	0.1286	24.58	0.1537	94.697	PO_min13
Mica zone	Phlogopite	42.45	0.0916	9.38	0.003	0.4523	12.19	4.64	0.1322	0.1309	24.35	0.1721	93.9921	PO_min13
Mica zone	Phlogopite	43.06	0	9.46	0.0381	0.4481	12.06	4.82	0.067	0.1294	24.26	0.1465	94.4892	PO_min13
Mica zone	Phlogopite	42.65	0.0215	9.2	0.0694	0.4067	11.47	4.55	0.1319	0.1203	24.78	0.1167	93.5166	PO_min9
Mica zone	Phlogopite	42.66	0	9.58	0.0784	0.3708	11.61	4.32	0	0.1466	25.26	0.1772	94.203	PO_min9
Mica zone	Phlogopite	42.86	0.0484	9.58	0.0489	0.3826	11.84	4.6	0.0361	0.1831	25.18	0.1446	94.9038	PO_min9
Mica zone	Talc	62.46	0	0.0023	0.0178	0.0586	0.1062	1.99	0.0089	0.2159	29.59	0	94.4498	PO_min11
Mica zone	Talc	62.51	0.0109	0.008	0.0129	0.0766	0.0814	2.07	0.0219	0.2437	29.46	0	94.4954	PO_min11
Mica zone	Talc	63.32	0.038	0.0068	0	0.0617	0.0556	2.28	0.0189	0.2213	29.54	0.0197	95.562	PO_min11
Mica zone	Talc	58.51	0	0.0523	0.0069	0.0557	0.1402	1.72	0.043	0.2059	27.23	0.0154	87.9795	PO_min12
Mica zone	Talc	52.72	0.0651	0.0887	0.004	0.0538	0.1576	1.93	0.0041	0.2108	23.75	0	78.9842	PO_min12
Mica zone	Talc	62.12	0.0435	0.0182	0	0.1457	0.1684	2.01	0.0295	0.2049	31.18	0.0227	95.943	PO_min12
Talc zone	Anthophyllite	58	0.7683	0.0032	0.0201	0.0269	0	11.95	0.2481	0.1406	26.45	0	97.6073	DO_Min1
Talc zone	Anthophyllite	58.68	0.8106	0.0205	0	0.0335	0.0156	12.06	0.2797	0.1212	26.41	0	98.4312	DO_Min1
Talc zone	Anthophyllite	58.5	0.7839	0.0108	0.0137	0.0238	0	12.47	0.2458	0.1312	26.3	0.0264	98.5057	DO_Min1
Talc zone	Anthophyllite	58.01	1.0932	0	0.0226	0.033	0.0106	12.36	0.257	0.1372	25.85	0	97.7737	DO_min6
Talc zone	Anthophyllite	58.11	0.8654	0	0.0199	0.0292	0.0084	12.45	0.3096	0.094	25.94	0	97.8266	DO_min6
Talc zone	Anthophyllite	58.09	0.8064	0	0	0.0264	0.0166	12.73	0.3146	0.1091	25.83	0.0132	97.9364	DO_min6
Talc zone	Chromite	0.4209	0.9568	0.0266	49.53	0.0384	2	43.45	0	0.0241	0.8861	0.2541	97.5871	DO_min11
Talc zone	Chromite	1.3497	0.9811	0.0602	51.72	0.073	1.8098	39.03	0.0055	0.032	1.0605	0.1428	96.2647	DO_min11
Talc zone	Chromite	33.06	0.7515	0.9028	20.93	0.134	2.1	20.58	0.2153	0.0626	17.8	0.0874	96.6236	DO_min11
Talc zone	Chromite	0	1.133	0.0479	52.58	0.0614	1.6126	41.92	0	0.0163	0.6507	0.1998	98.2218	DO_Min4
Talc zone	Chromite	0.1741	1.037	0.1349	51.58	0.0841	1.7236	42.19	0	0.0268	1.022	0.213	98.1856	DO_Min4
Talc zone	Phlogopite	43.21	0	6.5	0.4503	0.4396	11.45	4.16	0.9179	0.2466	24.72	0.1282	92.2226	DO_min10
Talc zone	Phlogopite	43.32	0.0753	7.33	0.5794	0.4126	11.51	4.29	0.5996	0.2033	25.08	0.1315	93.5318	DO_min10
Talc zone	Phlogopite	43.35	0.0376	7.38	0.523	0.3737	10.75	4.02	0.6121	0.1853	24.75	0.1234	92.1051	DO_min10
Talc zone	Phlogopite	42.99	0.0104	6.28	0.2941	0.2009	11.07	4.17	0.1399	0.2453	25.49	0.1225	91.0132	DO_Min2
Talc zone	Phlogopite	43.26	0	6.17	0.3011	0.1917	10.35	4.04	0.1112	0.2456	26.85	0.0852	91.6049	DO_Min2
Talc zone	Phlogopite	43.75	0.0363	6.48	0.3587	0.2327	11.27	4.18	0.1437	0.2313	25.43	0.1009	92.2137	DO_Min2
Talc zone	Phlogopite	43.26	0	9.23	0.4817	0.3333	11.24	3.99	0.01	0.2245	24.92	0.1819	93.8715	DO_min5
Talc zone	Phlogopite	43.38	0.0592	9.57	0.4612	0.3621	11.41	4.4	0	0.2267	25.1	0.1188	95.0881	DO_min5
Talc zone	Phlogopite	44	0.0591	8.94	0.393	0.3432	10.88	4.22	0.0254	0.18	24.97	0.1798	94.1906	DO_min5
Talc zone	Phlogopite	43.04	0.0482	8.81	0.4754	0.3135	11.15	4.36	0.132	0.2197	24.78	0.1177	93.4466	DO_min7
Talc zone	Phlogopite	43.4	0.0268	8.78	0.452	0.3634	11.06	4.2	0.0885	0.2379	25.28	0.1408	94.0294	DO_min7
Talc zone	Phlogopite	44.4	0	9.09	0.4008	0.3538	11.24	4.16	0.0668	0.1882	25.06	0.15	95.1097	DO_min7
Talc zone	Talc	62.78	0.0052	0.012	0.04	0.1	0.18	1.52	0	0.3075	29.12	0.0094	94.0742	DO_Min3
Talc zone	Talc	62.4	0.0052	0.0109	0.0304	0.0438	0.09	1.82	0.0113	0.2759	28.99	0.0118	93.6894	DO_Min3
Talc zone	Talc	62.37	0	0.0077	0.0219	0.0644	0.1228	1.88	0.0102	0.2689	29.49	0.0267	94.2626	DO_Min3
Talc zone	Talc	56.78	0.027	0.0363	0.076	0.1105	0.2073	1.56	0.0106	0.2497	25.1	0	84.1575	DO_min8
Talc zone	Talc	55.1	0.0108	0.0544	0.0464	0.049	0.1369	1.79	0	0.2831	30.09	0.0134	87.5741	DO_min8
Talc zone	Talc	61.06	0.0541	0.076	0.0523	0.1016	0.1688	1.83	0.0311	0.2678	28.03	0	91.6718	DO_min8
Talc zone	Talc	63.81	0	0.0409	0.0347	0.0816	0.1217	1.75	0.0383	0.2527	29.3	0	95.43	DO_min9
Talc zone	Talc	62.49	0.0054	0.008	0.0079	0.0513	0.1481	1.77	0	0.2919	29.67	0.0176	94.4603	DO_min9
Talc zone	Talc	63.85	0	0.0239	0.0297	0.0522	0.1487	1.84	0.0183	0.2582	29.53	0.0476	95.7987	DO_min9
