# Supplementary material
Source: MDPI journal article supplement (https://www.mdpi.com/2075-163X/10/1/85)
Supplement: s1 [file Table S3 - Zircon U-Pb isotope data.xlsx]

## Sheet: 186460
no	spot id	Final238_206	Final238_206_Prop2SE	Final207_206	Final207_206_Prop2SE	Final238_206	Final238_206_Prop2SE	Final207_206	Final207_206_Prop2SE	Discordance	Pb_ppm_m208	Pb_ppm_m208_Int2SE	Th_ppm_m232	Th_ppm_m232_Int2SE	U_ppm_m238	U_ppm_m238_Int2SE
1	460 - 1	1.76367	0.0342158	0.21774	0.0006	2895.49	44.5448	2964.05	4.43621	2.31312	230	8.5	58.6	1.9	318	12
2	460 - 2	1.70882	0.0350407	0.21764	0.00058	2969.93	47.9972	2963.31	4.2908	-0.223377	304	10	74.9	3.2	417	16
3	460 - 3	1.72295	0.0356227	0.21779	0.00059	2950.38	48.1355	2964.42	4.36125	0.473688	300	12	79.5	3.3	336	16
4	460 - 4	1.69005	0.0342751	0.21807	0.00062	2996.31	47.811	2966.49	4.57596	-1.00505	247	10	62.1	3.1	282	16
5	460 - 5	1.64339	0.0324086	0.21808	0.0006	3063.99	47.3359	2966.57	4.42835	-3.28412	174.5	5.9	42.5	1.6	241.3	9.5
6	460 - 6	1.68577	0.0341019	0.21792	0.00059	3002.38	47.7683	2965.39	4.35829	-1.24763	184	6.7	47.9	1.7	271.2	9.5
7	460 - 7	1.70213	0.0347669	0.21778	0.00058	2979.28	47.9311	2964.35	4.28766	-0.503575	352	13	91.2	3.5	467	16
8	460 - 8	1.68606	0.0341134	0.21767	0.00059	3001.98	47.7711	2963.53	4.36398	-1.29721	270.2	7.2	72.4	2.8	364	16
9	460 - 9	1.69722	0.0345665	0.21764	0.00064	2986.18	47.8825	2963.31	4.73393	-0.771571	168.4	6.2	43.9	1.4	253.6	8
10	460 - 10	1.71291	0.035209	0.21784	0.0006	2964.24	48.0375	2964.79	4.43389	0.0188095	165.2	6	44.2	1.7	220.1	8.1
11	460 - 11	1.6603	0.0330792	0.2177	0.0006	3039.1	47.5103	2963.76	4.43714	-2.54209	190.1	4.3	49.1	1.8	265	10
12	460 - 12	1.70474	0.0348736	0.21762	0.00059	2975.62	47.957	2963.16	4.36512	-0.420424	286	10	78	3.6	399	17
13	460 - 13	1.6559	0.0329042	0.21791	0.00061	3045.53	47.4652	2965.31	4.50603	-2.70531	206.3	8	53.4	1.9	291	11
14	460 - 14	1.70155	0.0347432	0.21753	0.00061	2980.09	47.9254	2962.5	4.51498	-0.593858	182	7.1	56.1	2.7	275	12
15	460 - 15	1.66528	0.0332778	0.21745	0.00059	3031.85	47.5611	2961.9	4.369	-2.36159	181.6	5	49.8	1.7	290	14
16	460 - 16	1.64069	0.0323023	0.21744	0.00059	3068	47.3079	2961.83	4.36923	-3.58463	337.9	8.1	91.8	3.4	475	19
17	460 - 17	1.65371	0.0328172	0.21731	0.00058	3048.75	47.4426	2960.87	4.29821	-2.96807	216.3	6.6	58	2.1	332	14
21	460 - 21	1.64935	0.0326442	0.21611	0.00059	3055.17	47.3976	2951.93	4.39983	-3.49735	335	12	92.9	3.2	609	29
23	460 - 23	1.65098	0.0327089	0.21739	0.00059	3052.76	47.4145	2961.46	4.37037	-3.08308	189.2	5.2	53.7	1.9	287	12
24	460 - 24	1.7191	0.0384189	0.21733	0.00059	2955.68	52.0344	2961.01	4.37175	0.18005	151.8	6.6	49.4	2	220	15
25	460 - 25	1.68067	0.0338959	0.2176	0.00062	3009.66	47.717	2963.02	4.5872	-1.57426	144.9	4.7	41.5	1.7	229.5	9.9
26	460 - 26	1.66141	0.0331232	0.21771	0.00059	3037.49	47.5215	2963.83	4.36307	-2.48519	247	6.6	69.9	2.6	370	18
